# Supplementary material
Source: Springer Nature journal article supplement (https://www.springermedizin.de/resource/supplementary/12939_2012_298_MOESM1_ESM.pdf/9550782)

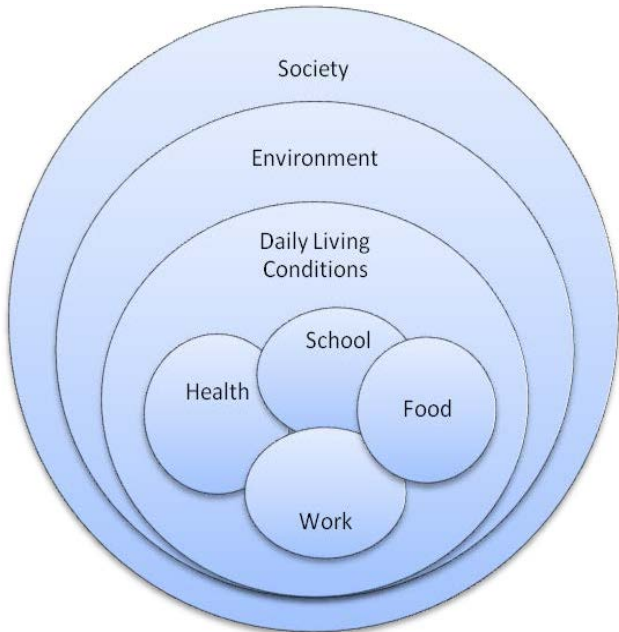

Society

Environment

Daily Living  
Conditions

Health

School

Food

Work

Supplement: MOESM1 [file 9550782]
